# Supplementary material for: Lithium diffusion study in Li2MnO3 and Li1.17Ni0.17Mn0.67O2: a combined experimental and computational approach
Source: Royal Society of Chemistry journal article supplement (doi:10.1039/c7cp06458f), 2017-01-01
Supplement: c7cp06458f1.pdf [file c7cp06458f1.pdf]

## Supporting Information

### Lithium diffusion study in $\text{Li}_2\text{MnO}_3$ and $\text{Li}_{1.17}\text{Ni}_{0.17}\text{Mn}_{0.67}\text{O}_2$ : a combine experimental and computational approach†

Tanmay Sarkar,<sup>abc</sup> K. R. Prakasha,<sup>bc</sup> Mridula Dixit Bharadwaj<sup>a</sup> and A. S. Prakash<sup>\*c</sup>

<sup>a</sup>Center for Study of Science, Technology and Policy (CSTEP), Bangalore 560094, India

<sup>b</sup>Academy of Scientific and Innovative Research (AcSIR) CSIR Madras Complex, Chennai 600113, India

<sup>c</sup>CSIR Central Electrochemical Research Institute, Chennai Unit, Chennai 600113, India

\*E-mail: [prakash.as@gmail.com](mailto:prakash.as@gmail.com), [prakash@cecri.res.in](mailto:prakash@cecri.res.in)

## 1 Experimental details

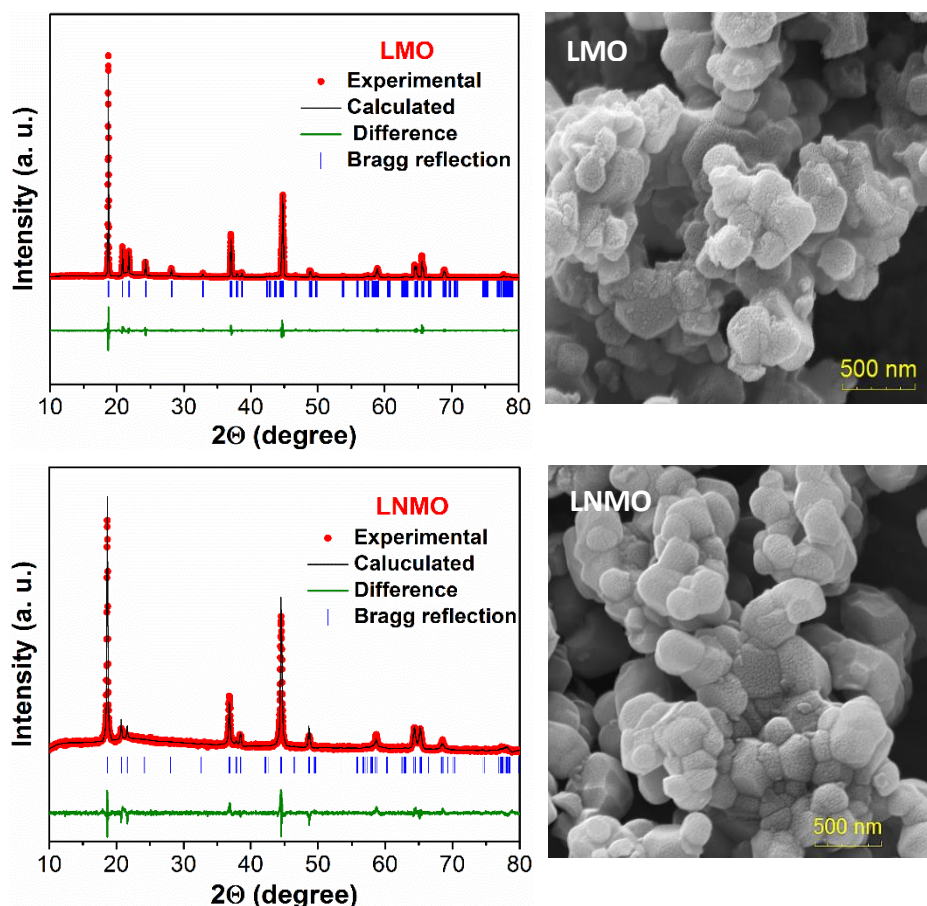

**Fig. S1** Rietveld refinement fitting of X-ray diffraction pattern of both LMO and LNMO phases showing the experimental data points (red), calculated pattern (black), their difference (green), Bragg diffraction positions (blue tick marks) and SEM (scale bar is 500 nm) images of as prepared LMO and LNMO powder samples.

The powder XRD pattern of both LMO and LNMO and their Rietveld fit were shown in Fig. S1. All the reflections were indexed in a monoclinic cell with a space group C2/m. FESEM

images of both the powder samples shown in Fig. S1 exhibit uniform morphology with agglomeration of the particles of size in the range 100–300 nm.

## 2 Theoretical details

### 2.1 Energy barrier profile

For  $d_{2b-4h}$  diffusion path of  $\text{Li}_2\text{MnO}_3$  (Fig. 1a from main manuscript), Li diffusion from Li4 position to Li14 position is considered to study the diffusion barrier. In the process to calculate diffusion barrier, four coordinates of Li have been created between Li4 and Li14. Each Li coordinate present in four different  $\text{Li}_2\text{MnO}_3$  structures. Later, all the structures are optimized with nudged elastic band (NEB) method<sup>1</sup>. The relative value of total energy between one structure to another is calculated. These values are plotted with the distance between two Li atoms in the energy profile. Similarly, all the energy profiles have been generated for both the compounds.

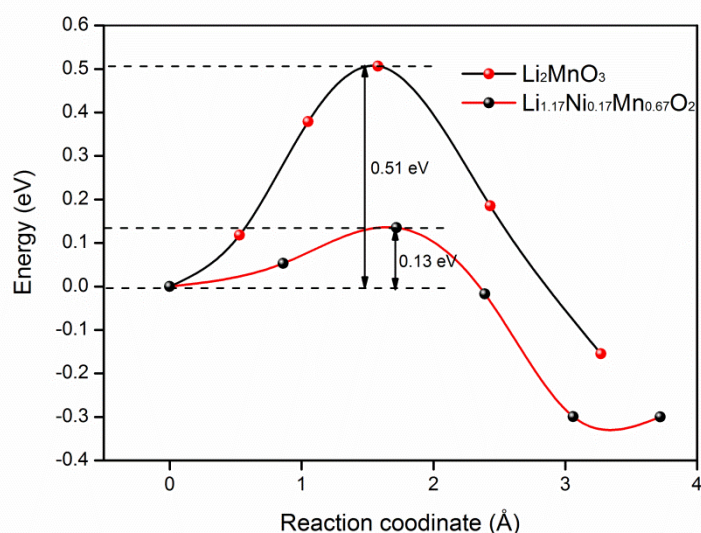

**Fig. S2** Energy barrier profile on single Li diffusion along  $d_{2b-2c}$  in LMO and LNMO.

**Table S1** Bond sum value of Li in  $\text{Li}_2\text{MnO}_3$  and  $\text{Li}_{1.17}\text{Ni}_{0.17}\text{Mn}_{0.67}\text{O}_2$

|               | Bond sum value            |                                                              |
|---------------|---------------------------|--------------------------------------------------------------|
|               | $\text{Li}_2\text{MnO}_3$ | $\text{Li}_{1.17}\text{Ni}_{0.17}\text{Mn}_{0.67}\text{O}_2$ |
| Li in 2c site | 1.03                      | 1.08                                                         |
| Li in 2b site | 1.11                      | 1.00                                                         |
| Li in 4h site | 1.02                      | 0.94                                                         |

## References

1 H. Jonsson, G. Mills and K. W. Jacobsen, *Classical and Quantum Dynamics in Condensed Phase Simulations*, edited by D. Chandler, B. J. Berne, G. Ciccotti, and D. F. Coker (World Scientific, Singapore, 1998), 385–404.
